# Supplementary material
Source: publisher site journal article supplement (https://www.dovepress.com/article/594688)
Supplement: Supplementary file 1 [file Supporting%20Information.docx]

**Supporting Information**

**A Photothermally Triggered Nanoplatform for Multidimensional Antibacterial Therapy and Accelerated Healing of Infected Wounds**

Yueying Fan1, *, Jinfu Li1, *, Peng Wang1, *, Yuhuan Peng1, Chao Yan1, Xiangyang Li1, Zhaoxiang Wang1, Xiao Li1, Zhanchen He1, Wenqiang Li2, Bin Yin1, #, Chiyu Jia1, #

1 Center of Burn & Plastic and Wound Healing Surgery, The First Affiliated Hospital of University of South China, Hengyang Medical School, University of South China, Hengyang, Hunan, 421001, People’s Republic of China

2 Guangdong Traditional Medical and Sports Injury Rehabilitation Research Institute, The Affiliated Guangdong Second Provincial General Hospital of Jinan University, Guangzhou, 510317, People’s Republic of China.

*These authors contributed equally to this work.

#Corresponding authors.

E-mail addresses: ybyinbin@126.com (Bin Yin), jiachiyu309@163.com (Chiyu Jia).


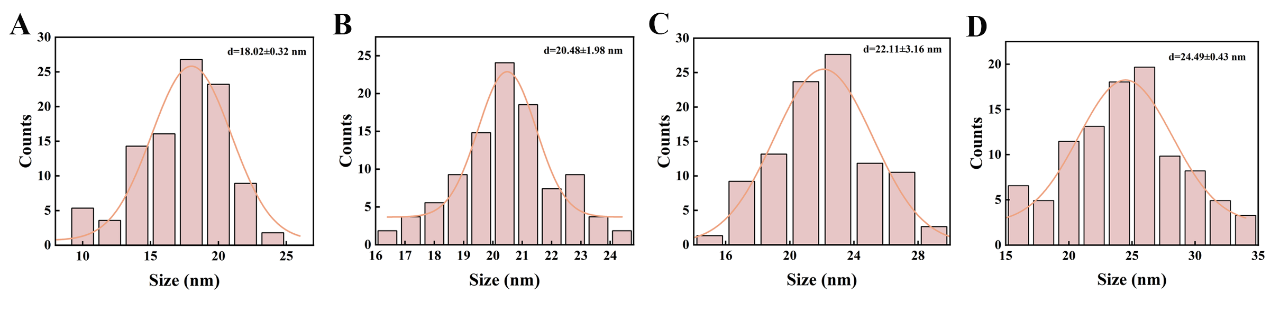


**Figure S1.** (A-D) Particle size distributions of Cu7S4 (A), CSC (B), CCP (C) and CCP-DFO(Fe) measured from the TEM images.


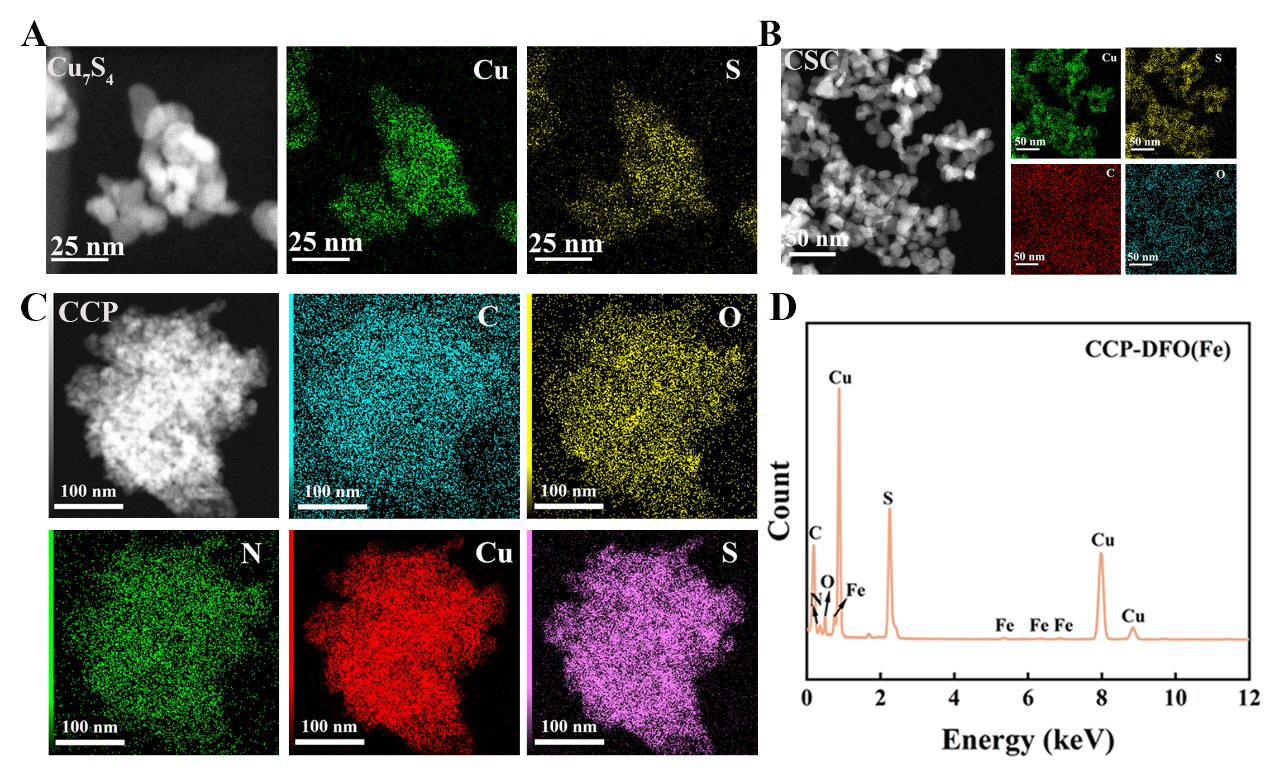


**Figure S2.** TEM elemental mapping images of the nanoparticles: (A) Cu7S4, (B) CSC, (C) CCP and (D) EDS spectrum of CCP-DFO(Fe).


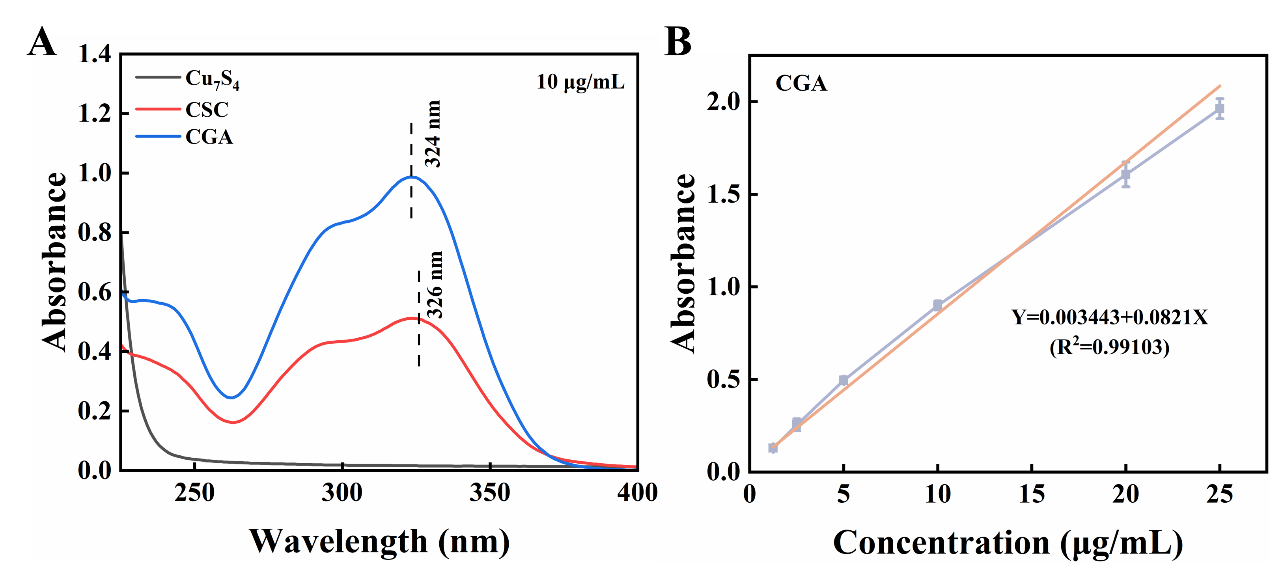


**Figure S3.** (A) UV spectra of different nanoparticles and CGA; (B) Standard fitting curve of UV absorbance for CGA.


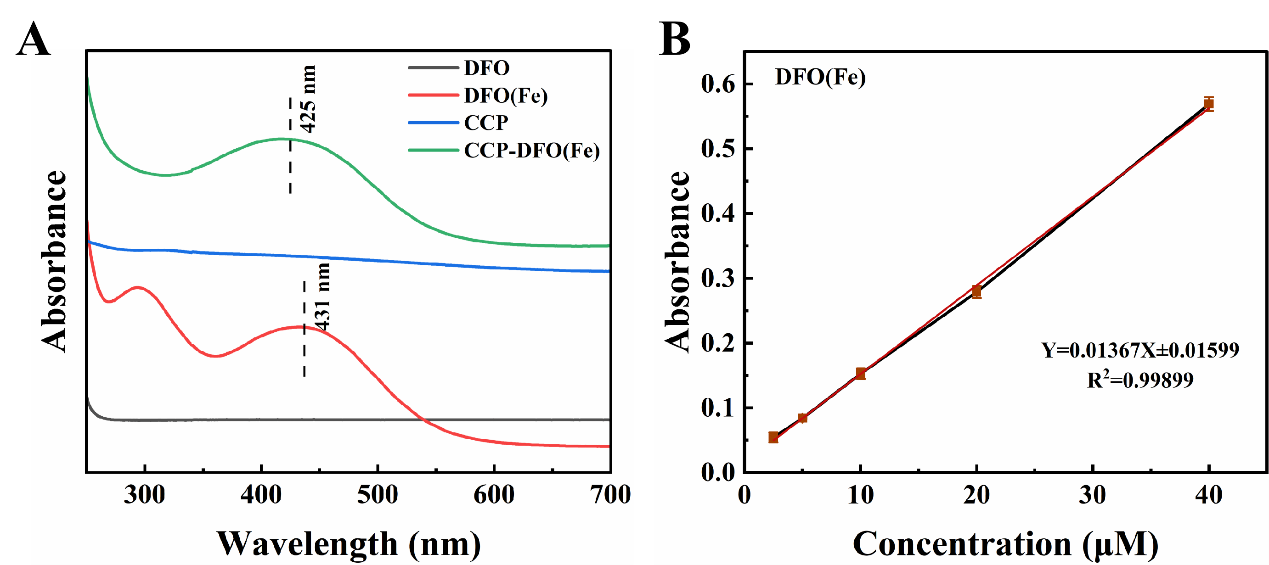


**Figure S4.** (A) UV spectra of DFO, DFO(Fe), CCP nanoparticles, and CCP-DFO(Fe) nanoparticles;(B) Standard fitting curve of UV absorbance for DFO(Fe).

**Table S1.** Mass percentages of components in CCP-DFO(Fe) nanoparticles.

| Component | Cu7S4 | CGA | PVCL | DFO(Fe) |
| --- | --- | --- | --- | --- |
| Mass percentage (%) | 70.3 | 14.93 | 8.26 | 6.5 |


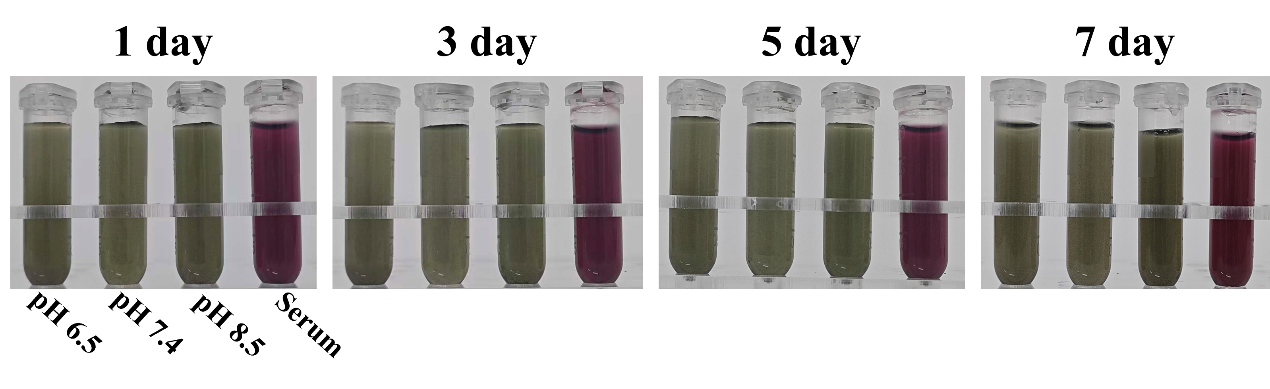


**Figure S5.** Storage stability of CCP-DFO(Fe) nanoparticles in different media (pH 6.5, pH 7.4, pH 8.5, and serum).


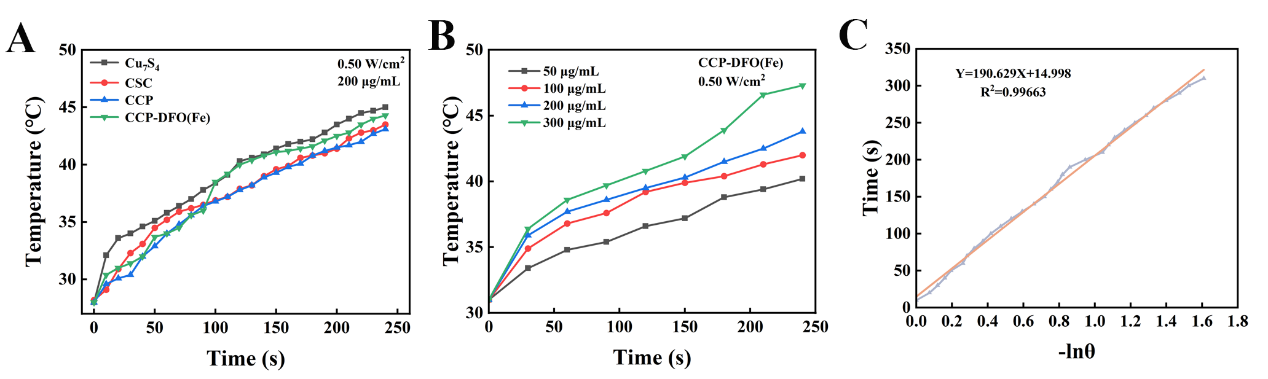


**Figure S6.** (A) Temperature elevation curves of different materials (200 μg/mL) under NIR laser irradiation (0.5 W/cm2) for 4 minutes. (B) Heating curves of CCP‑DFO(Fe) at different concentrations over 4 minutes. (C) Linear fit of the cooling stage for CCP‑DFO(Fe).


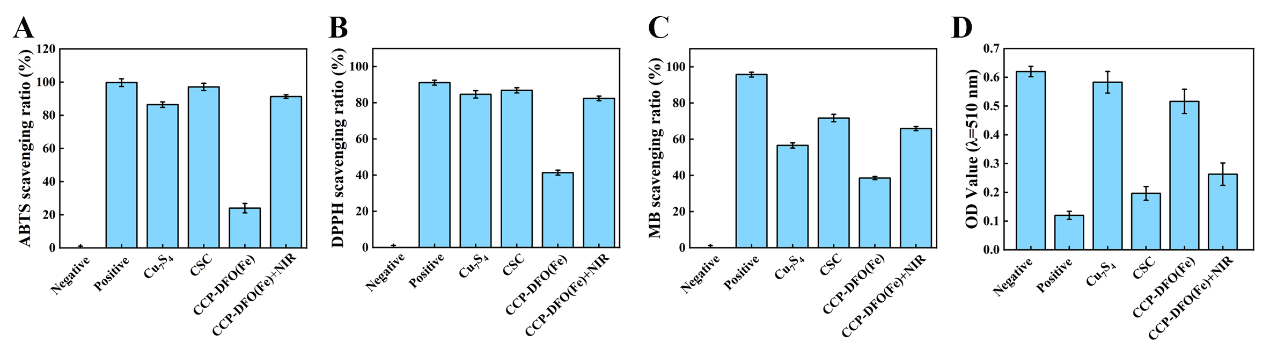


**Figure S7.** Free radical scavenging activity of different materials. (A) ABTS, (B) DPPH, and (C) MB scavenging efficiency. (D) OD values (λ = 510 nm) from the salicylic acid chromogenic assay.

**

**

**Figure S8.** Comparison of bacterial survival ratios among different materials via plating assay.





**Figure S9.** Cell survival rate of CCK-8 experiment after co-culturing HUVECs with CCP-DFO(Fe) nanoparticle solution for 24 hours under different NIR power irradiation for 10 minutes.


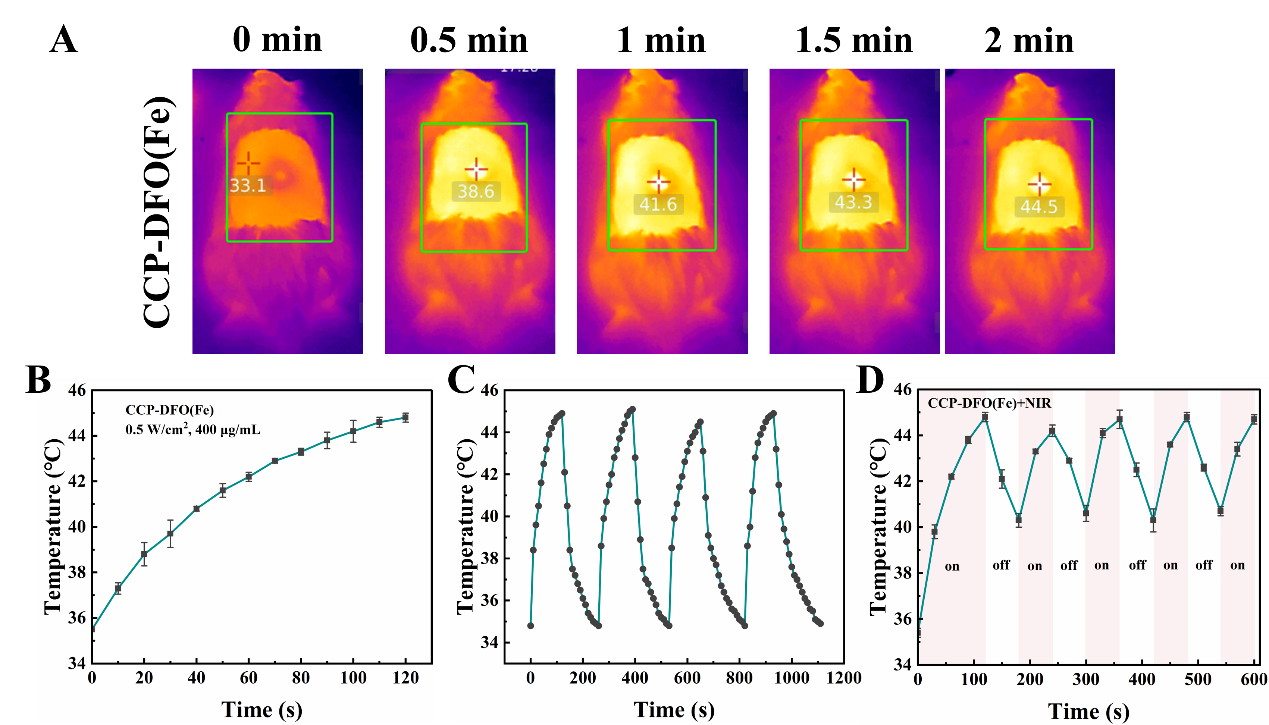


**Figure S10.** Photothermal heating effect of CCP-DFO(Fe) nanoparticle solution on SD rat wounds. (A) Infrared thermal imaging of rat wounds under NIR irradiation at 0.5W/cm2 for 2 minutes; (B) Wound temperature rise/drop cycle under NIR irradiation at 0.5W/cm2; (C) Wound temperature changes under NIR on/off at 0.5W/cm2 for 10 minutes.


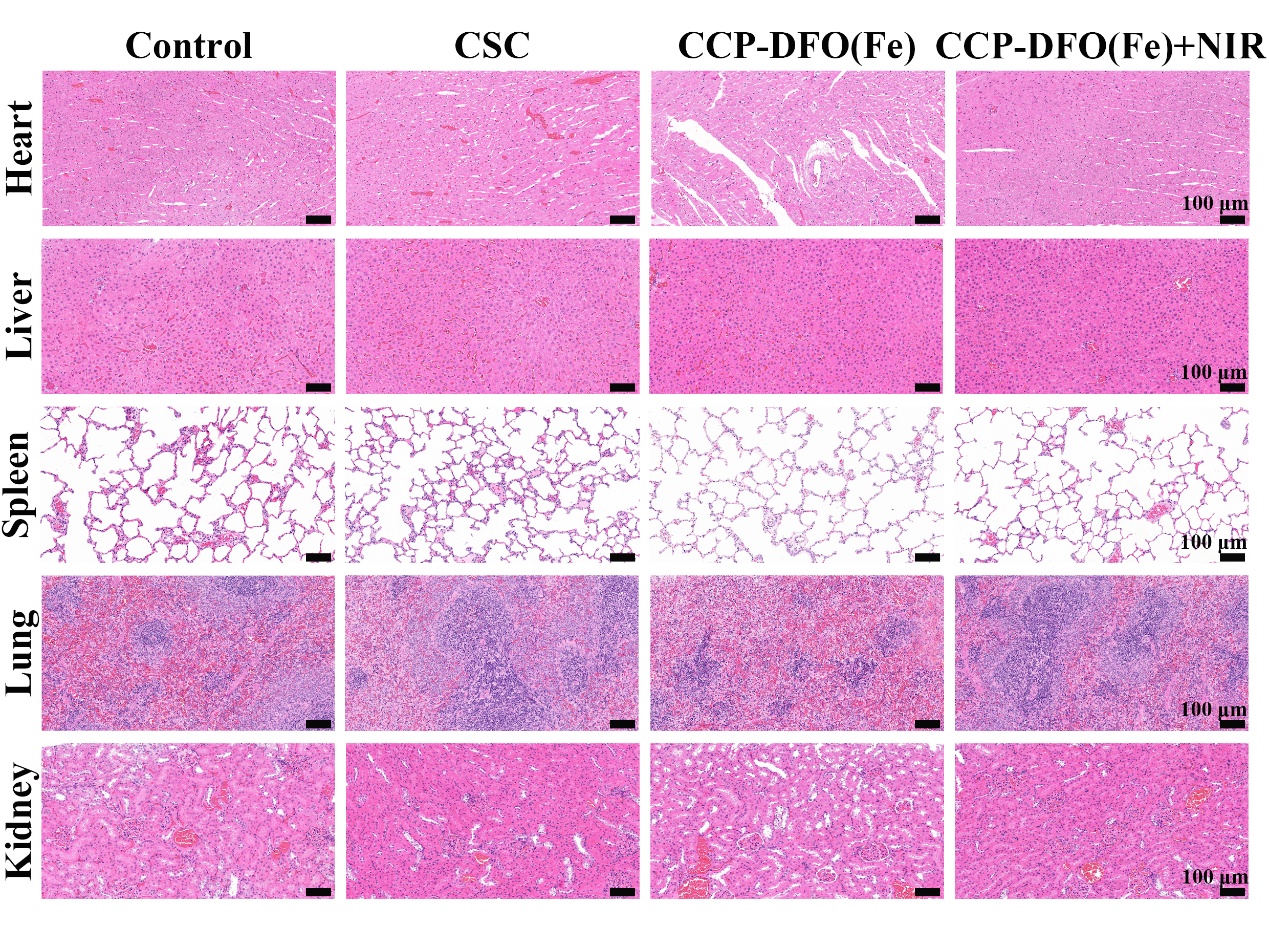


**Figure S11.** Representative histological sections of rat heart, liver, spleen, lung, and kidney from different treatment groups at day 14 post-treatment.


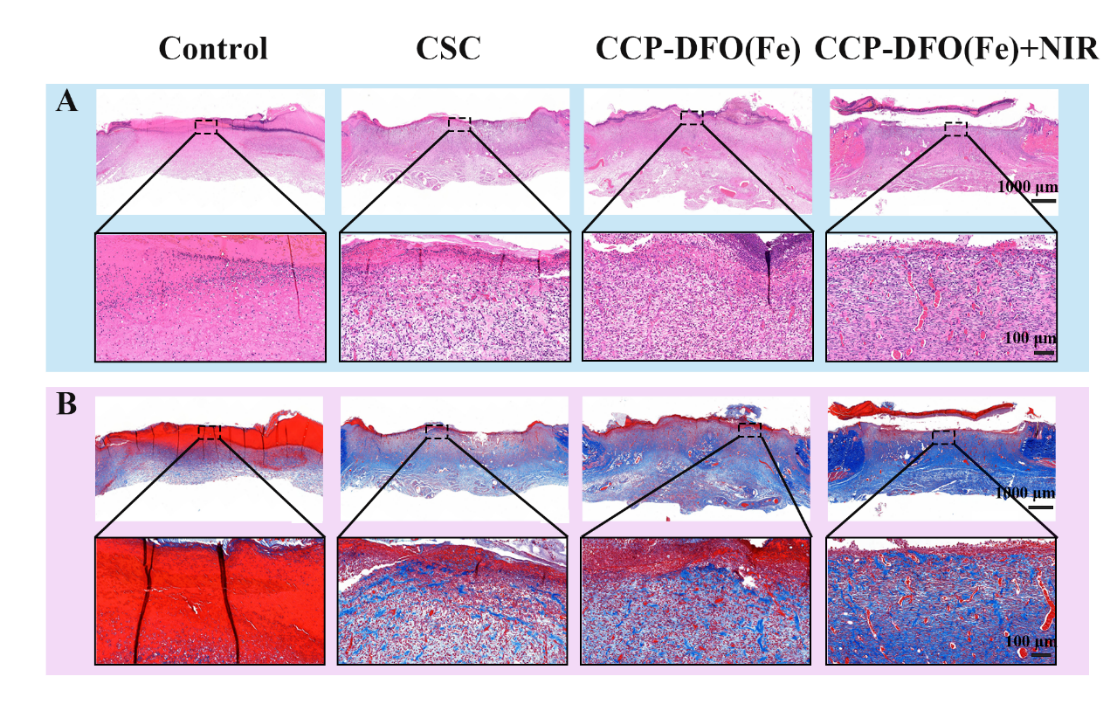


**Figure S12.** Representative histological images of rat wound sections from different treatment groups at day 7 post-treatment. (A) H&E staining. (B) Masson’s trichrome staining.
